# Supplementary material
Source: Springer Nature journal article supplement (https://www.springermedizin.de/resource/supplementary/12957_2014_1807_MOESM5_ESM.pdf/9563584)

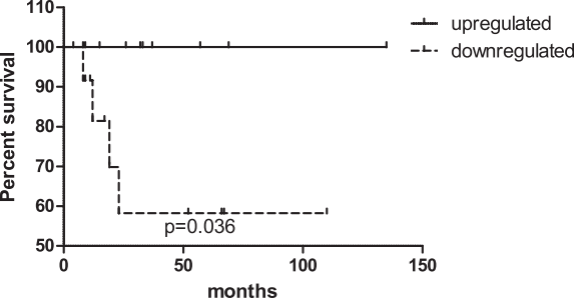

Supplement: MOESM5 [file 9563584]
